# Supplementary material for: Micro-kinetic modeling of temporal analysis of products data using kinetics-informed neural networks
Source: Royal Society of Chemistry journal article supplement (doi:10.1039/d4dd00163j), 2024-01-01
Supplement: d4dd00163j1.pdf [file d4dd00163j1.pdf]

---

# MICRO-KINETIC MODELING OF TEMPORAL ANALYSIS OF PRODUCTS DATA USING KINETICS-INFORMED NEURAL NETWORKS

SUPPLEMENTARY INFORMATION

---

Dingqi Nai<sup>a</sup>, Gabriel S. Gusmão<sup>a</sup>, Zachary A. Kilwein<sup>a</sup>, Fani Boukouvala<sup>a</sup>, Andrew J. Medford<sup>a\*</sup>

<sup>a</sup>School of Chemical & Biomolecular Engineering  
Georgia Institute of Technology  
Atlanta, GA 30332

September 12, 2024

## S1 Multi-pulse ideal scenario

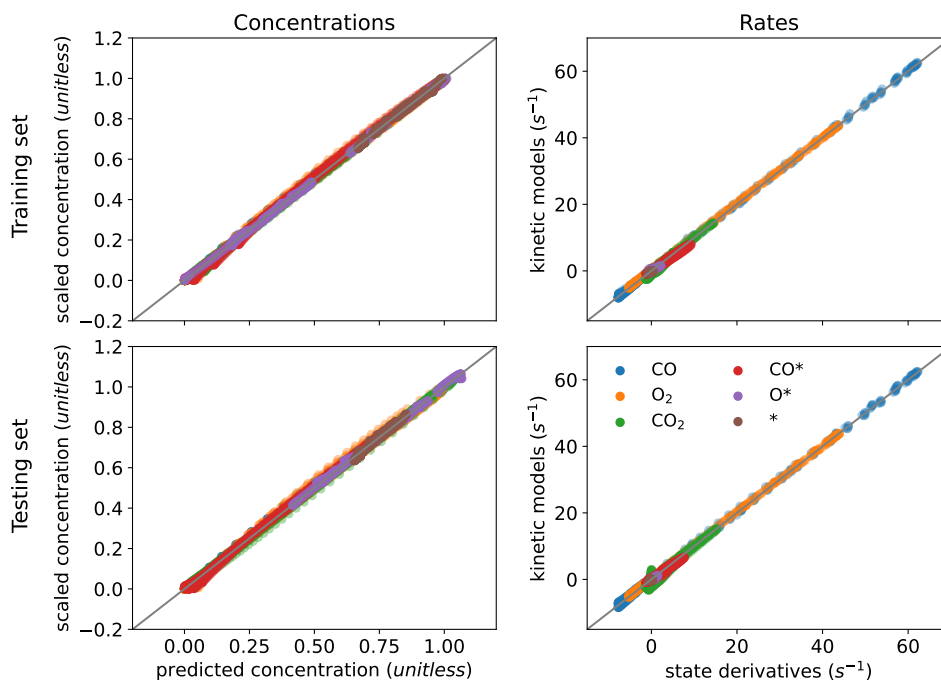

Figure S1: Training (top) and testing (bottom) performance on the concentration prediction and kinetic model fitting for multi-pulse ideal scenario.

---

\* Email: [ajm@gatech.edu](mailto:ajm@gatech.edu)

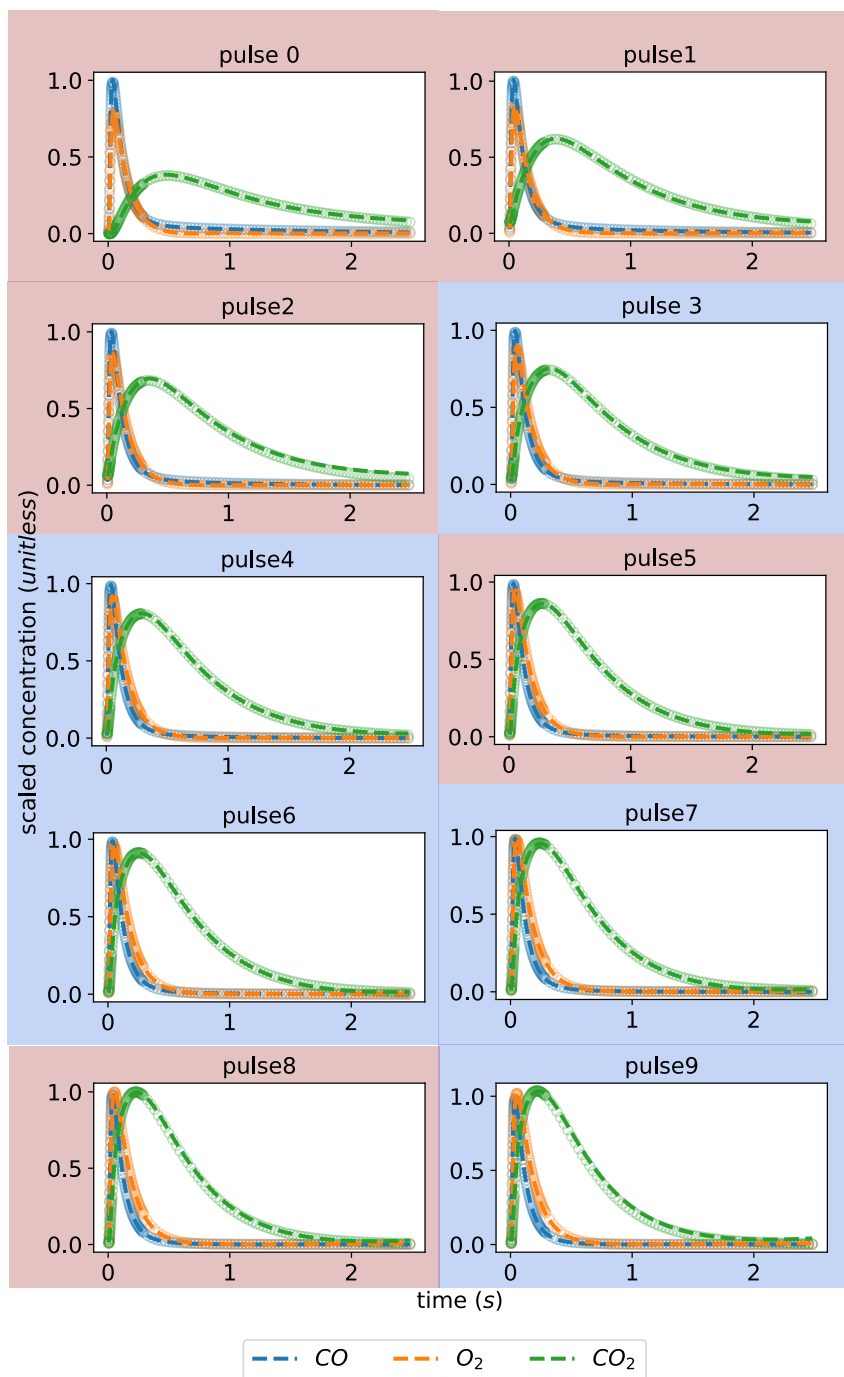

Figure S2: KINN's predicted scaled concentration (dash line) and target ground truth value (dot) for the training set (red background) and interpolating to the testing set (blue background) for gas species.

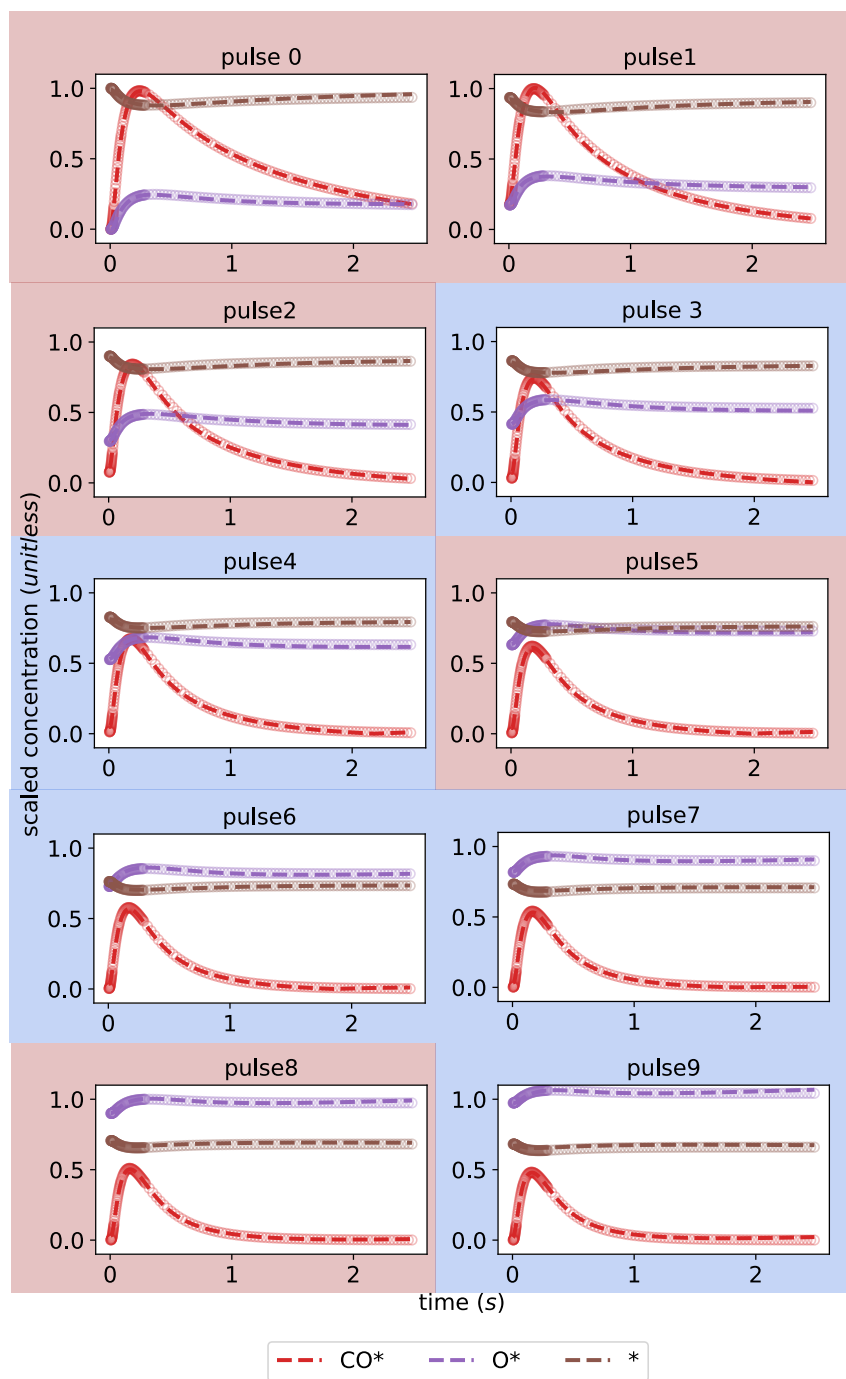

Figure S3: KINN's predicted scaled concentration (dash line) and target ground truth value (dot) for the training set (red background) and interpolating to the testing set (blue background) for adspecies.

## S2 Multi-pulse practical scenario

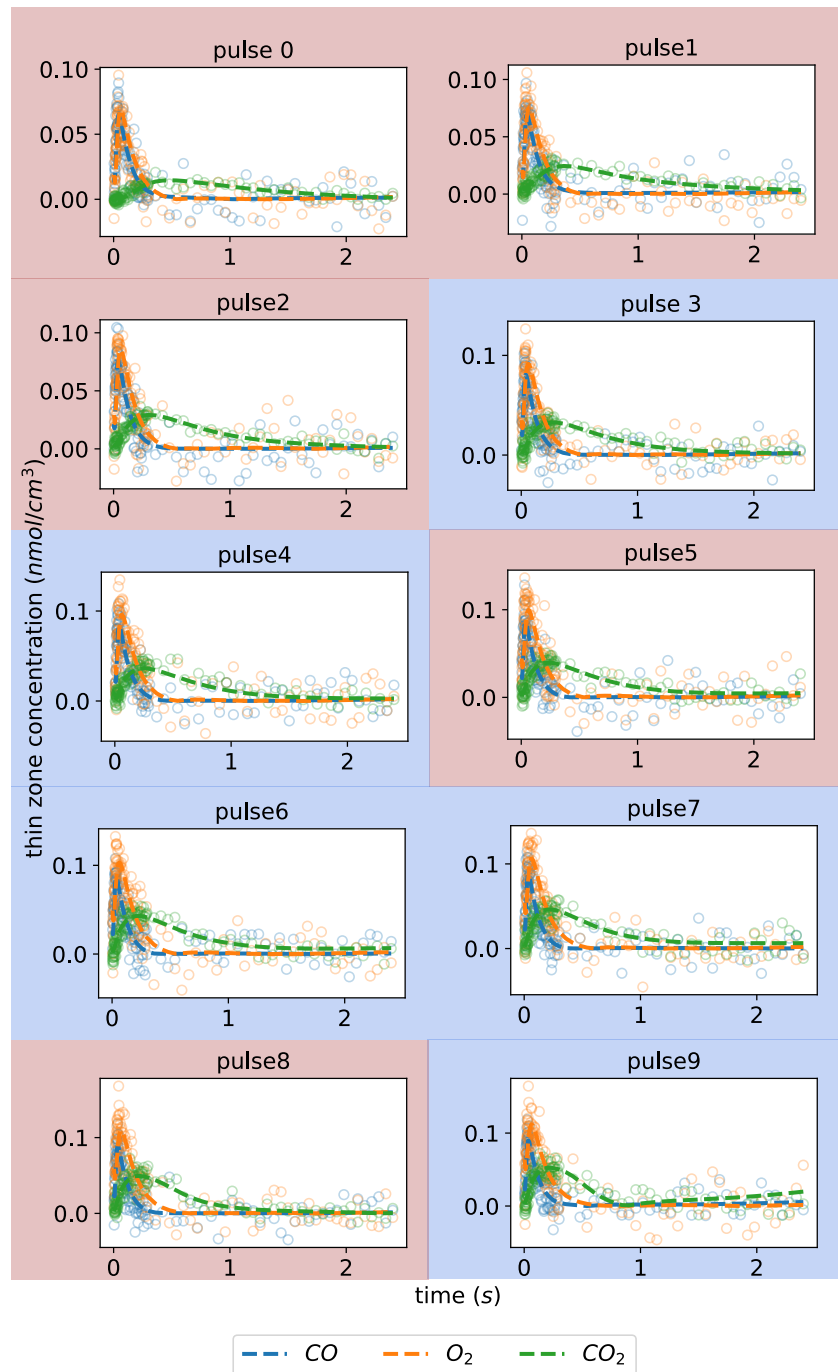

Figure S4: KINN's predicted scaled concentration (dash line) and target ground truth value (dot) for the training set (red background) and interpolating to the testing set (blue background) for gas species. The discontinuity at 0 happens because the absolute value is taken at the output layer as we consider negative concentration is invalid, but the continuous states goes negative because of the noise. A use of softplus/swish layer can solve this discontinuity by test.



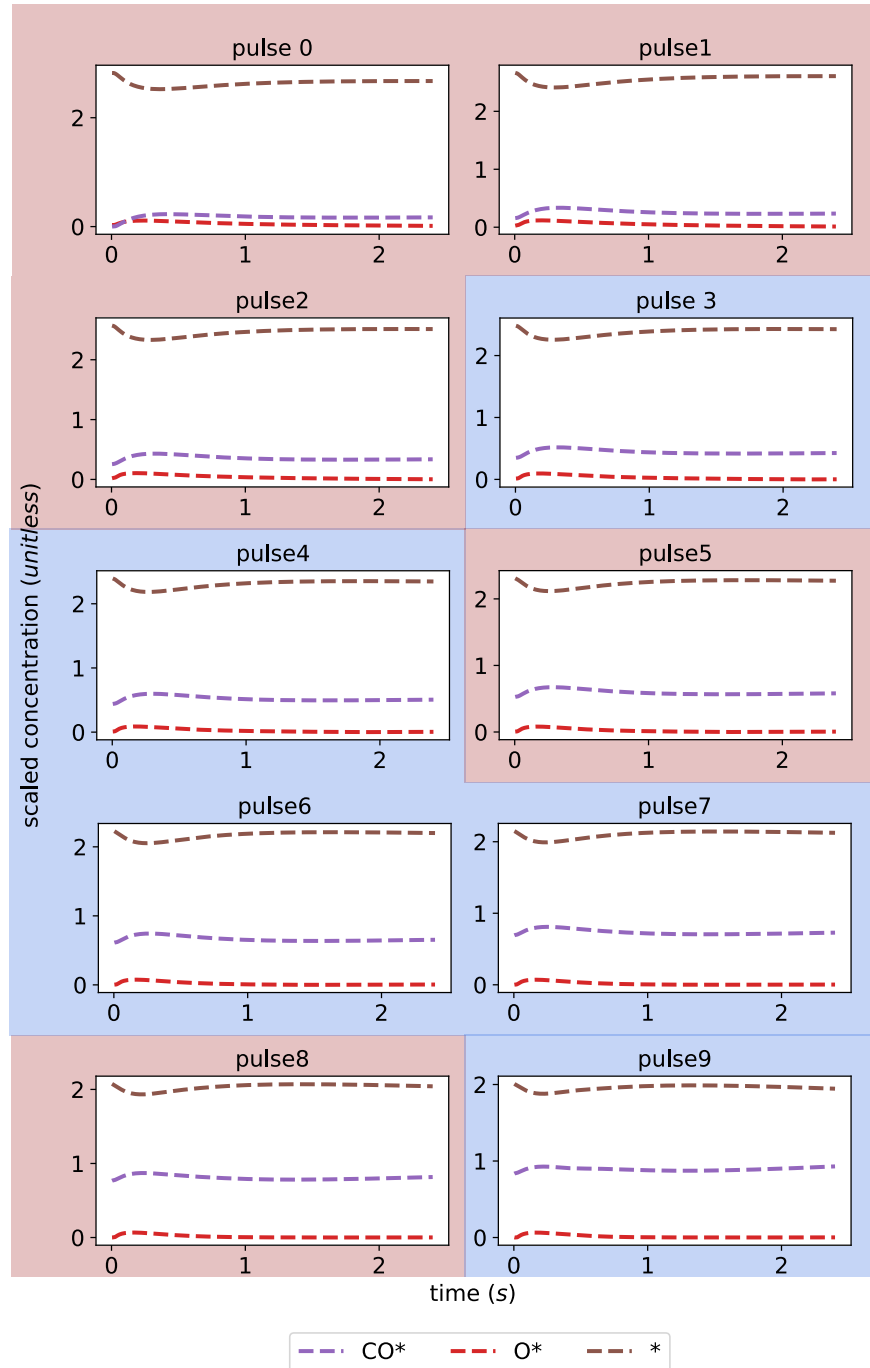

Figure S5: KINN's predicted scaled concentration (dash line) for the training set (red background) and interpolating to the testing set (blue background) for adspecies. The ground truth concentrations are not available in practical scenario, so only the predicted values are shown. Compared to Figure S3, the scaled concentrations are different because they are scaled with different values. In the ideal case, the adspecies concentrations are rescaled with the maximum ground truth values of each species; in the practical case, they are rescaled with the maximum atomic uptake value.

### S2.1 Multi-pulse training effect on kinetic model quality

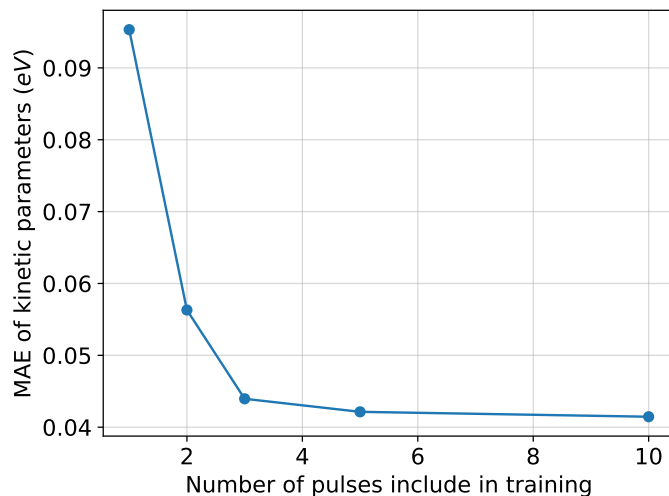

Figure S6: MAE of kinetic parameters as a function of the number of pulses included in training for the practical multi-pulse scenario. Note that the MAE is higher than reported in the main text since fewer epochs were used and the  $\alpha$  value was not as carefully optimized.

### S3 Multi-pulse analysis compared to differential algebraic programming

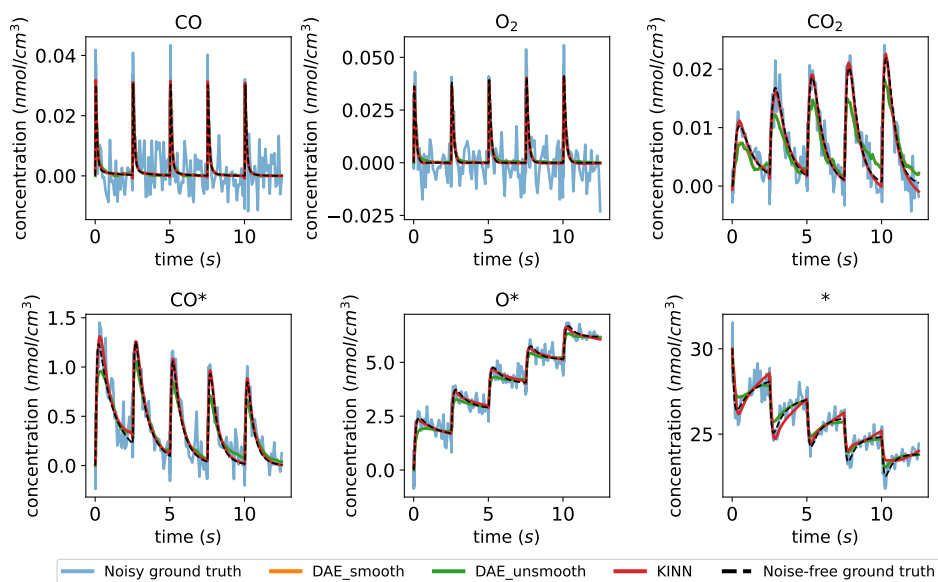

Figure S7: Concentration fitting of DAE and the KINN at 0.5 $\sigma$  noise level.

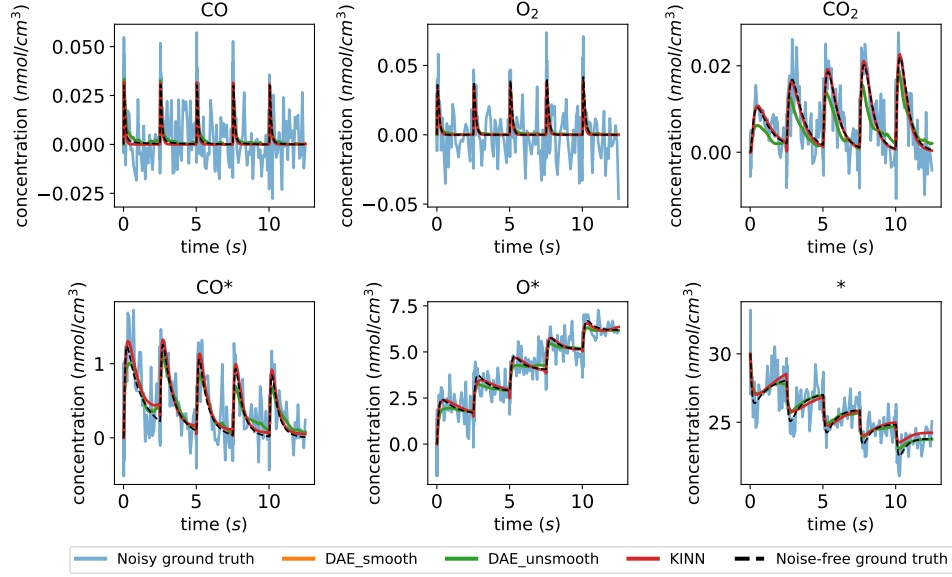

Figure S8: Concentration fitting of DAE and the KINN at  $1.0\sigma$  noise level.

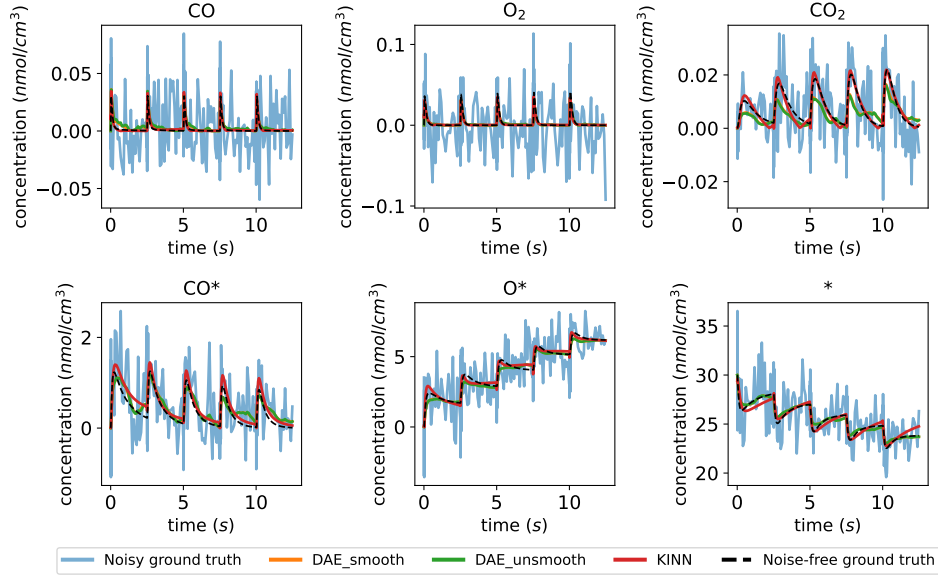

Figure S9: Concentration fitting of DAE and the KINN at  $2.0\sigma$  noise level.

| Parameter | KINN  | DAE smooth | DAE unsmooth |
|-----------|-------|------------|--------------|
| $k_1$     | 10.90 | 11.60      | 11.63        |
| $k_{-1}$  | 0.129 | 0.503      | 0.593        |
| $k_2$     | 0.348 | 0.264      | 0.263        |
| $k_3$     | 0.434 | 0.625      | 0.630        |
| $k_{-3}$  | 0.020 | 0.115      | 0.117        |
| $k_4$     | 13.36 | 10.32      | 10.19        |

Table S1: Kinetic parameters extracted from KINNs and DAE on  $0.5\sigma$  noise level.

| Parameter | KINN  | DAE smooth | DAE unsmooth |
|-----------|-------|------------|--------------|
| $k_1$     | 9.587 | 10.37      | 10.40        |
| $k_{-1}$  | 0.175 | 0.793      | 1.009        |
| $k_2$     | 0.322 | 0.279      | 0.277        |
| $k_3$     | 0.469 | 19.57      | —            |
| $k_{-3}$  | 0.029 | 8.069      | —            |
| $k_4$     | 10.02 | 20.92      | 21.71        |

Table S2: Kinetic parameters extracted from KINNs and DAE on  $1.0\sigma$  noise level.

| Parameter | KINN  | DAE smooth | DAE unsmooth |
|-----------|-------|------------|--------------|
| $k_1$     | 10.07 | 9.500      | 9.647        |
| $k_{-1}$  | 0.416 | 1.354      | 1.780        |
| $k_2$     | 0.378 | 0.312      | 0.310        |
| $k_3$     | 0.290 | —          | —            |
| $k_{-3}$  | 0.021 | —          | —            |
| $k_4$     | 9.761 | 29.91      | 32.01        |

Table S3: Kinetic parameters extracted from KINNs and DAE on  $2.0\sigma$  noise level.

## S4 KINNs Setup

The KINNs setup and hyperparameters at the ending state are provided in this section. All NN parameters are available on github in .npz format.

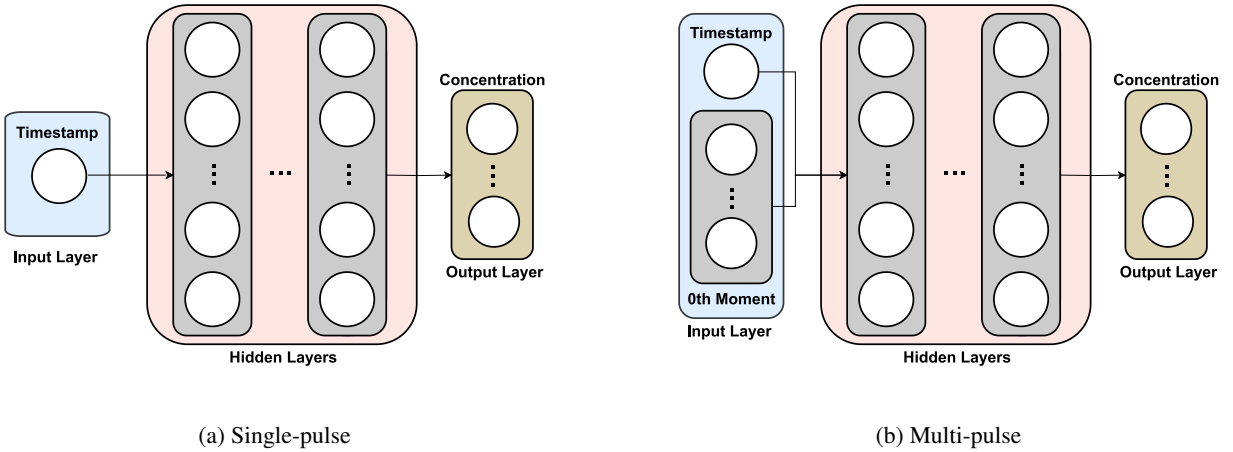

Figure S10: Conceptual diagram for the NN structure used for (a) single-pulse and (b) multi-pulse cases.

### S4.1 Single-pulse ideal scenario

|                                       |           |
|---------------------------------------|-----------|
| Activation function                   | swish     |
| NN structure                          | [1, 8, 6] |
| NN parameters initialization scale    | 1e-2      |
| Model parameters initialization scale | 1e-5      |
| Step size                             | 1e-3      |
| Ending $\alpha$                       | 1         |

**S4.2 Multi-pulse ideal scenario**

|                                       |                |
|---------------------------------------|----------------|
| Activation function                   | swish          |
| NN structure                          | [4, 10, 10, 6] |
| NN parameters initialization scale    | 1e-2           |
| Model parameters initialization scale | 1e-5           |
| Step size                             | 1e-3           |
| Ending $\alpha$                       | 1e-3           |

**S4.3 Multi-pulse practical scenario**

|                                       |                |
|---------------------------------------|----------------|
| Activation function                   | swish          |
| NN structure                          | [4, 10, 10, 6] |
| NN parameters initialization scale    | 1e-2           |
| Model parameters initialization scale | 1e-5           |
| Step size                             | 1e-3           |
| Ending $\alpha$                       | 1e-3           |
| Ending $\beta$                        | 1              |

**S5 Code**

The full code of this work is available at <https://github.com/medford-group/kinn-tap>, Zenodo DOI: 10.5281/zenodo.13754686.
